# Supplementary material for: Assessment of genetic homogeneity of somatic embryo-derived plants and seed-derived plants of a robusta coffee cultivar using molecular markers and functional genes sequencing
Source: Springer Nature journal article supplement (doi:10.1007/s11240-023-02468-9), 2023-03-06
Supplement: 11240_2023_2468_MOESM1_ESM.pdf [file 11240_2023_2468_MOESM1_ESM.pdf]

**Assessment of genetic homogeneity of somatic embryo- derived plants and seed-derived plants of a robusta coffee cultivar using molecular markers and functional genes sequencing**

**Manoj Kumar Mishra\*, Pavankumar Jingade, Arun Kumar C. Huded, Bychappa Muniswamy**

Tissue Culture & Biotechnology Division, Unit of Central Coffee Research Institute, Coffee Board, Manasagangothri, Mysore-570 006. India

**Journal Name:** Plant Cell, Tissue and Organ culture

**Corresponding author:** Manoj Kumar Mishra

**Email:** [manojmishra.m@gmail.com](mailto:manojmishra.m@gmail.com)

**Online resource 1:** Similarity coefficient of somatic embryo-derived plants and CxR mother plant generated using the combined SRAP-SCoT data.

|       | MP    | SE-1  | SE-2  | SE-3  | SE-4  | SE-5  | SE-6  | SE-7  | SE-8  | SE-9  | SE-10 | SE-11 | SE-12 |
|-------|-------|-------|-------|-------|-------|-------|-------|-------|-------|-------|-------|-------|-------|
| MP    | 1.000 |       |       |       |       |       |       |       |       |       |       |       |       |
| SE-1  | 0.980 | 1.000 |       |       |       |       |       |       |       |       |       |       |       |
| SE-2  | 0.976 | 0.996 | 1.000 |       |       |       |       |       |       |       |       |       |       |
| SE-3  | 0.980 | 1.000 | 0.996 | 1.000 |       |       |       |       |       |       |       |       |       |
| SE-4  | 0.959 | 0.980 | 0.976 | 0.980 | 1.000 |       |       |       |       |       |       |       |       |
| SE-5  | 0.929 | 0.934 | 0.929 | 0.934 | 0.946 | 1.000 |       |       |       |       |       |       |       |
| SE-6  | 0.922 | 0.918 | 0.914 | 0.918 | 0.913 | 0.942 | 1.000 |       |       |       |       |       |       |
| SE-7  | 0.976 | 0.988 | 0.984 | 0.988 | 0.976 | 0.929 | 0.922 | 1.000 |       |       |       |       |       |
| SE-8  | 0.976 | 0.996 | 0.992 | 0.996 | 0.984 | 0.938 | 0.922 | 0.992 | 1.000 |       |       |       |       |
| SE-9  | 0.964 | 0.984 | 0.980 | 0.984 | 0.980 | 0.942 | 0.909 | 0.980 | 0.988 | 1.000 |       |       |       |
| SE-10 | 0.880 | 0.885 | 0.889 | 0.885 | 0.879 | 0.863 | 0.890 | 0.880 | 0.889 | 0.893 | 1.000 |       |       |
| SE-11 | 0.946 | 0.942 | 0.938 | 0.942 | 0.937 | 0.923 | 0.942 | 0.954 | 0.946 | 0.942 | 0.899 | 1.000 |       |
| SE-12 | 0.976 | 0.988 | 0.984 | 0.988 | 0.975 | 0.929 | 0.922 | 0.992 | 0.992 | 0.980 | 0.879 | 0.946 | 1.000 |

**Online resource 2:** Similarity coefficient of seed-derived plants and CxRmother plant generated using the combined SRAP-SCoT markers data.

|             | <b>MP</b> | <b>SD-1</b> | <b>SD-2</b> | <b>SD-3</b> | <b>SD-4</b> | <b>SD-5</b> | <b>SD-6</b> | <b>SD-7</b> | <b>SD-8</b> |
|-------------|-----------|-------------|-------------|-------------|-------------|-------------|-------------|-------------|-------------|
| <b>MP</b>   | 1.000     |             |             |             |             |             |             |             |             |
| <b>SD-1</b> | 0.967     | 1.000       |             |             |             |             |             |             |             |
| <b>SD-2</b> | 0.964     | 0.980       | 1.000       |             |             |             |             |             |             |
| <b>SD-3</b> | 0.954     | 0.979       | 0.967       | 1.000       |             |             |             |             |             |
| <b>SD-4</b> | 0.951     | 0.975       | 0.972       | 0.962       | 1.000       |             |             |             |             |
| <b>SD-5</b> | 0.967     | 0.959       | 0.955       | 0.970       | 0.950       | 1.000       |             |             |             |
| <b>SD-6</b> | 0.955     | 0.946       | 0.959       | 0.966       | 0.954       | 0.979       | 1.000       |             |             |
| <b>SD-7</b> | 0.955     | 0.946       | 0.951       | 0.949       | 0.946       | 0.954       | 0.958       | 1.000       |             |
| <b>SD-8</b> | 0.951     | 0.943       | 0.955       | 0.946       | 0.943       | 0.959       | 0.954       | 0.988       | 1.000       |

**Online resource 3:** The sequence size of the *matK*, partial NAC25, Zinc Finger Protein and UDP-glycosyltransferase genes isolated from seed-derived plants and somatic embryo-derived plant samples derived from the same CxR mother plant.

| Sr. No.             | CxR samples  | Sequence Size (bp) |              |                     |                         |
|---------------------|--------------|--------------------|--------------|---------------------|-------------------------|
|                     |              | <i>matK</i>        | PartialNAC25 | Zinc Finger Protein | UDP-glycosyltransferase |
| 1                   | <b>MP</b>    | 881                | 568          | 423                 | 495                     |
| 2                   | <b>SD-2</b>  | 881                | 568          | 422                 | 495                     |
| 3                   | <b>SD-5</b>  | 881                | 567          | 424                 | 495                     |
| 4                   | <b>SD-8</b>  | 879                | 568          | 421                 | 495                     |
| 5                   | <b>SE-1</b>  | 882                | 568          | 419                 | 495                     |
| 6                   | <b>SE-10</b> | 881                | 566          | 424                 | 496                     |
| 7                   | <b>SE-11</b> | 881                | 568          | 420                 | 496                     |
| <b>Average size</b> |              | <b>880.9</b>       | <b>567.6</b> | <b>421.9</b>        | <b>495.3</b>            |

**Note:** MP-Mother Plant; SD-Seed-derived plantsand SE-Somatic embryo-derived plants

**Online resource 4:** The sequence size and nucleotide base contents of the *matK*, partial NAC25, Zinc Finger Protein and UDP-glycosyltransferase genes obtained from seed-derived plants and somatic embryo-derived along with CxR mother plant.

| Sr. no. | Gene                    | Avg. Size (bp) | Nucleotide Content (%) | CxR Samples |       |       |       |       |       |       | Avg.  |
|---------|-------------------------|----------------|------------------------|-------------|-------|-------|-------|-------|-------|-------|-------|
|         |                         |                |                        | MP          | SD-2  | SD-5  | SD-8  | SE-1  | SE-10 | SE-11 |       |
| 1       | <i>matK</i>             | 881            | A                      | 36.78       | 36.78 | 36.78 | 36.97 | 36.73 | 36.78 | 36.78 | 36.80 |
|         |                         |                | C                      | 15.32       | 15.32 | 15.32 | 15.36 | 15.42 | 15.32 | 15.32 | 15.34 |
|         |                         |                | G                      | 17.93       | 17.93 | 17.93 | 17.75 | 17.91 | 17.93 | 17.93 | 17.90 |
|         |                         |                | T                      | 29.97       | 29.97 | 29.97 | 29.92 | 29.93 | 29.97 | 29.97 | 29.96 |
|         |                         |                | G+C                    | 33.26       | 33.26 | 33.26 | 33.11 | 33.33 | 33.26 | 33.26 | 33.25 |
| 2       | Partial NAC25           | 568            | A                      | 28.35       | 28.17 | 29.10 | 28.35 | 28.35 | 28.27 | 27.99 | 28.37 |
|         |                         |                | C                      | 17.43       | 17.25 | 17.46 | 17.43 | 17.43 | 17.31 | 17.25 | 17.37 |
|         |                         |                | G                      | 24.30       | 24.30 | 23.81 | 24.30 | 24.30 | 24.38 | 24.30 | 24.24 |
|         |                         |                | T                      | 29.93       | 30.28 | 29.63 | 29.93 | 29.93 | 30.04 | 30.46 | 30.03 |
|         |                         |                | G+C                    | 41.73       | 41.55 | 41.27 | 41.73 | 41.73 | 41.70 | 41.55 | 41.61 |
| 3       | Zinc Finger Protein     | 422            | A                      | 25.53       | 25.12 | 25.00 | 25.18 | 25.78 | 26.18 | 25.71 | 25.50 |
|         |                         |                | C                      | 28.13       | 27.73 | 27.83 | 27.79 | 27.45 | 28.07 | 27.14 | 27.73 |
|         |                         |                | G                      | 17.02       | 17.06 | 16.75 | 17.34 | 18.38 | 17.45 | 16.67 | 17.24 |
|         |                         |                | T                      | 29.31       | 30.09 | 30.42 | 29.69 | 28.40 | 28.30 | 30.48 | 29.53 |
|         |                         |                | G+C                    | 45.15       | 44.79 | 44.58 | 45.13 | 45.82 | 45.52 | 43.81 | 44.97 |
| 4       | UDP-glycosyltransferase | 495            | A                      | 26.06       | 26.67 | 26.87 | 26.46 | 26.26 | 26.41 | 26.21 | 26.42 |
|         |                         |                | C                      | 23.84       | 23.43 | 23.43 | 23.43 | 23.64 | 23.59 | 23.19 | 23.51 |
|         |                         |                | G                      | 25.25       | 24.85 | 24.65 | 24.85 | 24.85 | 25.20 | 25.00 | 24.95 |
|         |                         |                | T                      | 24.85       | 25.05 | 25.05 | 25.25 | 25.25 | 24.80 | 25.00 | 25.04 |
|         |                         |                | G+C                    | 49.09       | 48.28 | 48.08 | 48.28 | 48.48 | 48.79 | 48.19 | 48.46 |

**Note:** MP-Mother Plant; SD-Seed-derived plantsand SE-Somatic embryo-derived plants

**Online resource 5:** Parsimony Informative sites (PIC) and Singleton variable sites of four genes.

| Gene                    | Parameter                | Sites          | Positions                                                                                                                                                                              | Total | Grand Total |
|-------------------------|--------------------------|----------------|----------------------------------------------------------------------------------------------------------------------------------------------------------------------------------------|-------|-------------|
| <i>matK</i>             | PIC                      | Two variants   | -                                                                                                                                                                                      | -     | -           |
|                         |                          | Three variants | -                                                                                                                                                                                      | -     |             |
|                         | Singleton Variable sites | Two variants   | 865, 878 and 879                                                                                                                                                                       | 3     | 3           |
|                         |                          | Three variants | -                                                                                                                                                                                      | -     |             |
| Partial NAC25           | PIC                      | Two variants   | 5 and 556                                                                                                                                                                              | 2     | 2           |
|                         |                          | Three variants | -                                                                                                                                                                                      | -     |             |
|                         | Singleton Variable sites | Two variants   | 6, 204, 526, 556 and 565                                                                                                                                                               | 5     | 5           |
|                         |                          | Three variants | -                                                                                                                                                                                      | -     |             |
| Zinc Finger Protein     | PIC                      | Two variants   | 82, 92, 114, 166, 200, 251, 257, 265, 271, 272, 278, 280, 287, 296, 306, 311, 316, 319, 320, 321, 325, 365, 370, 377, 385 and 419                                                      | 26    | 28          |
|                         |                          | Three variants | 209 and 275                                                                                                                                                                            | 2     |             |
|                         | Singleton Variable sites | Two variants   | 2, 23, 83, 102, 162, 184, 202, 240, 248, 269, 277, 279, 294, 299, 301, 303, 308, 309, 312, 317, 318, 326, 331, 334, 340, 341, 342, 350, 375, 383, 407, 415, 422, 425, 426, 427 and 428 | 37    | 38          |
|                         |                          | Three variants | 307                                                                                                                                                                                    | 1     |             |
| UDP-glycosyltransferase | PIC                      | Two variants   | 95, 96, 189, 195, 353 and 433                                                                                                                                                          | 6     | 7           |
|                         |                          | Three variants | 363                                                                                                                                                                                    | 1     |             |
|                         | Singleton Variable sites | Two variants   | 3, 4, 5, 56, 82, 99, 170, 233, 350 and 404                                                                                                                                             | 10    | 10          |
|                         |                          | Three variants | -                                                                                                                                                                                      | -     |             |

**Online resource 6:** Maximum likelihood based substitution matrix of the *matK*, partial NAC25, Zinc Finger Protein and UDP-glycosyltransferase genes estimated using Tamura-Nei model.

| <i>matK gene</i> |          |              |              |          | NAC25    |             |             |             | Zinc Finger Protein |          |              |              | UDP-glycosyltransferase |              |          |             |              |              |             |
|------------------|----------|--------------|--------------|----------|----------|-------------|-------------|-------------|---------------------|----------|--------------|--------------|-------------------------|--------------|----------|-------------|--------------|--------------|-------------|
|                  | A        | T            | C            | G        |          | A           | T           | C           | G                   |          | A            | T            | C                       | G            |          | A           | T            | C            | G           |
| <b>A</b>         | -        | 9.29         | 4.78         | <b>0</b> | <b>A</b> | -           | 10.19       | 5.94        | <b>8.15</b>         | <b>A</b> | -            | 4.75         | 4.42                    | <b>14.33</b> | <b>A</b> | -           | 6.68         | 6.25         | <b>7.94</b> |
| <b>T</b>         | 11.45    | -            | <b>12.88</b> | 5.52     | <b>T</b> | 9.69        | -           | <b>5.19</b> | 8.31                | <b>T</b> | 4.03         | -            | <b>15.82</b>            | 2.77         | <b>T</b> | 7.03        | -            | <b>14.72</b> | 6.62        |
| <b>C</b>         | 11.45    | <b>25.06</b> | -            | 5.52     | <b>C</b> | 9.69        | <b>8.90</b> | -           | 8.31                | <b>C</b> | 4.03         | <b>17.00</b> | -                       | 2.77         | <b>C</b> | 7.03        | <b>15.73</b> | -            | 6.62        |
| <b>G</b>         | <b>0</b> | 9.29         | 4.78         | -        | <b>G</b> | <b>9.51</b> | 10.19       | 5.94        | -                   | <b>G</b> | <b>20.90</b> | 4.75         | 4.42                    | -            | <b>G</b> | <b>8.43</b> | 6.68         | 6.25         | -           |

**Note:** Highlighted percent is **Transition** while **Non-highlighted** percent is **Transversion**

**Online resource 7:** The number of synonymous and non-synonymous SNP from the four genes isolated from CxR samples.

| Sr. No. | Gene                    | SD-2 |    | SD-5 |    | SD-8 |    | SE-1 |    | SE-10 |    | SE-11 |    |
|---------|-------------------------|------|----|------|----|------|----|------|----|-------|----|-------|----|
|         |                         | S    | NS | S    | NS | S    | NS | S    | NS | S     | NS | S     | NS |
| 1       | <i>matK</i>             | -    | -  | -    | -  | -    | -  | -    | 4  | -     | -  | -     | -  |
| 2       | Partial NAC25           | -    | 2  | 1    | 7  | -    | 2  | -    | -  | -     | 2  | 1     | 2  |
| 3       | Zinc Finger Protein     | 6    | 9  | 8    | 11 | 2    | 12 | 3    | 34 | 9     | 24 | 3     | 23 |
| 4       | UDP-glycosyltransferase | 2    | 4  | -    | 13 | -    | 5  | 1    | 4  | 1     | 3  | 1     | 7  |
